# Supplementary material for: Asymmetric protonation of EmrE
Source: PubMed Central journal article supplement — J Gen Physiol. 2015 Dec;146(6):445–61. doi: 10.1085/jgp.201511404 (PMC4664823; doi:10.1085/jgp.201511404), 2015-12
Supplement: supp_jgp.201511404_JGP_201511404_sm.pdf [file supp_jgp.201511404_JGP_201511404_sm.pdf]

Henzler-Wildman et al., <http://www.jgp.org/cgi/content/full/jgp.201511404/DC1>

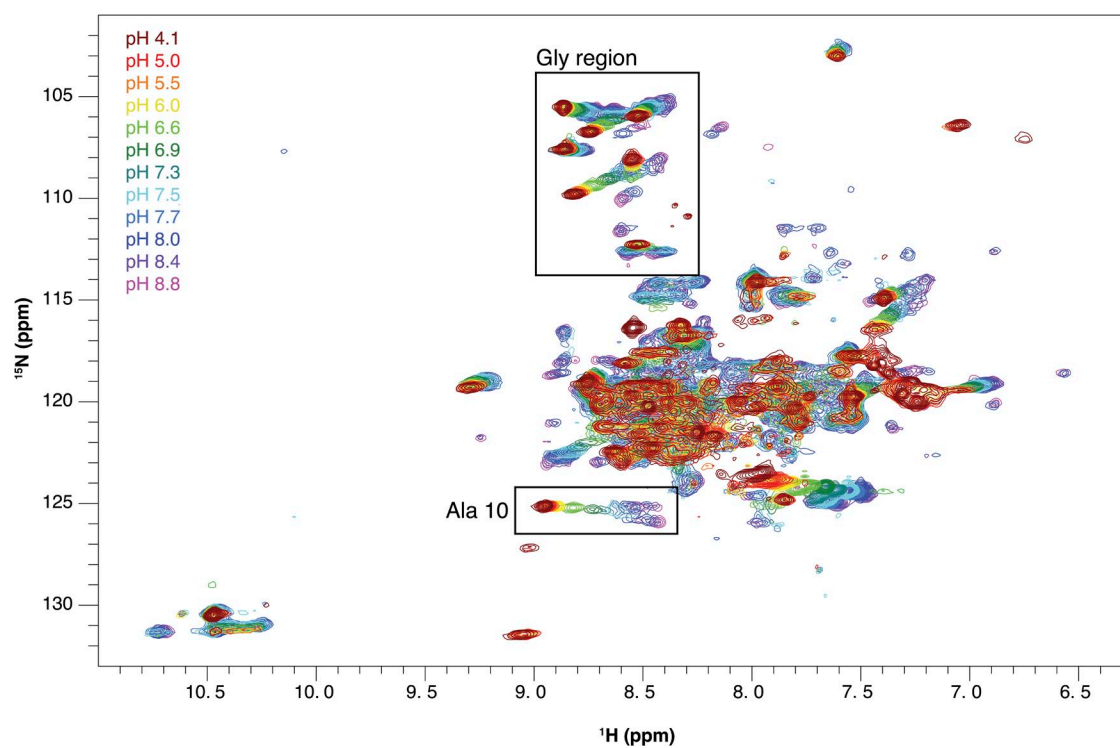

**Figure S1.** Drug-free WT EmrE is sensitive to pH. Full  $^1\text{H}$ - $^{15}\text{N}$  TROSY-HSQC spectra of drug-free WT EmrE in DLPC/DHPC isotropic bicelles at all pH values collected in the pH titration at 45°C. The pH of each spectrum is indicated by its color as designated in the figure. Boxes highlight regions analyzed further in the main text.

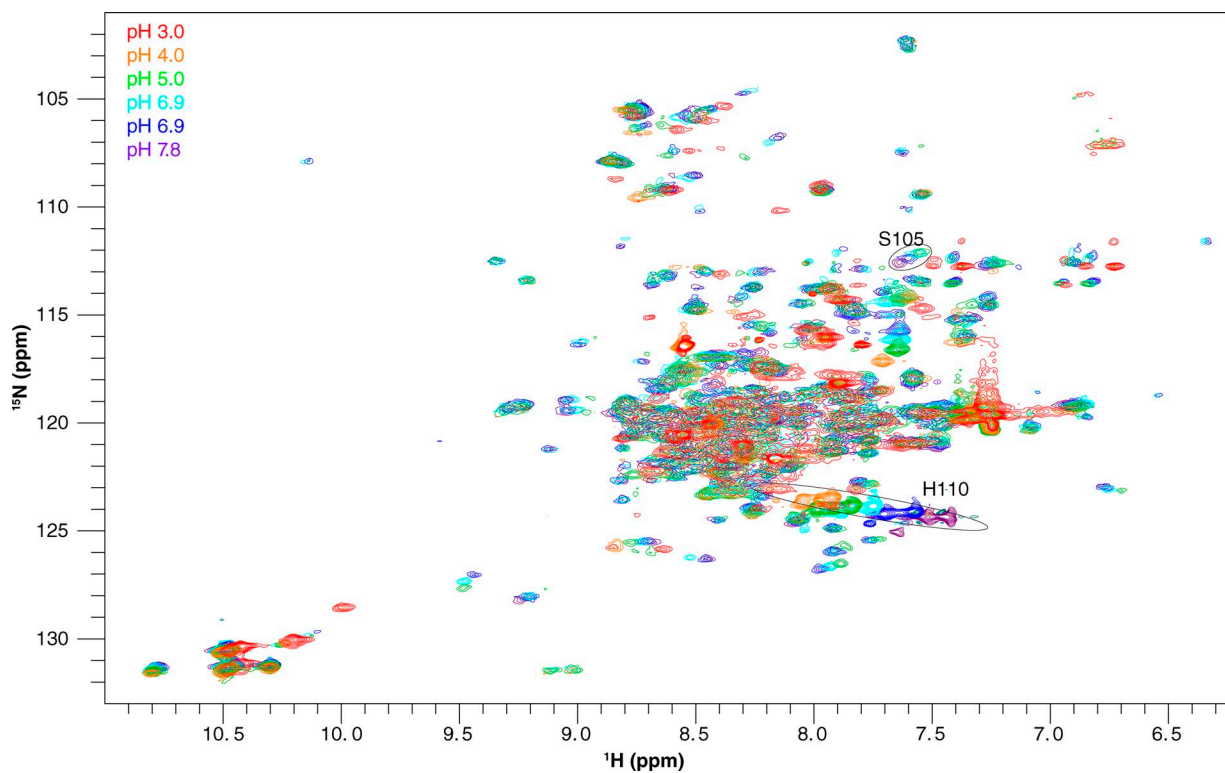

**Figure S2.** Drug-free E14D-EmrE is sensitive to pH. Full  $^1\text{H}$ - $^{15}\text{N}$  TROSY-HSQC spectra of drug-free E14D-EmrE in DLPC/DHPC isotropic bicelles at all pH values collected in the pH titration at 45°C. The pH of each spectrum is indicated by its color as designated in the figure. Circles highlight residues near the titratable H110 residue.

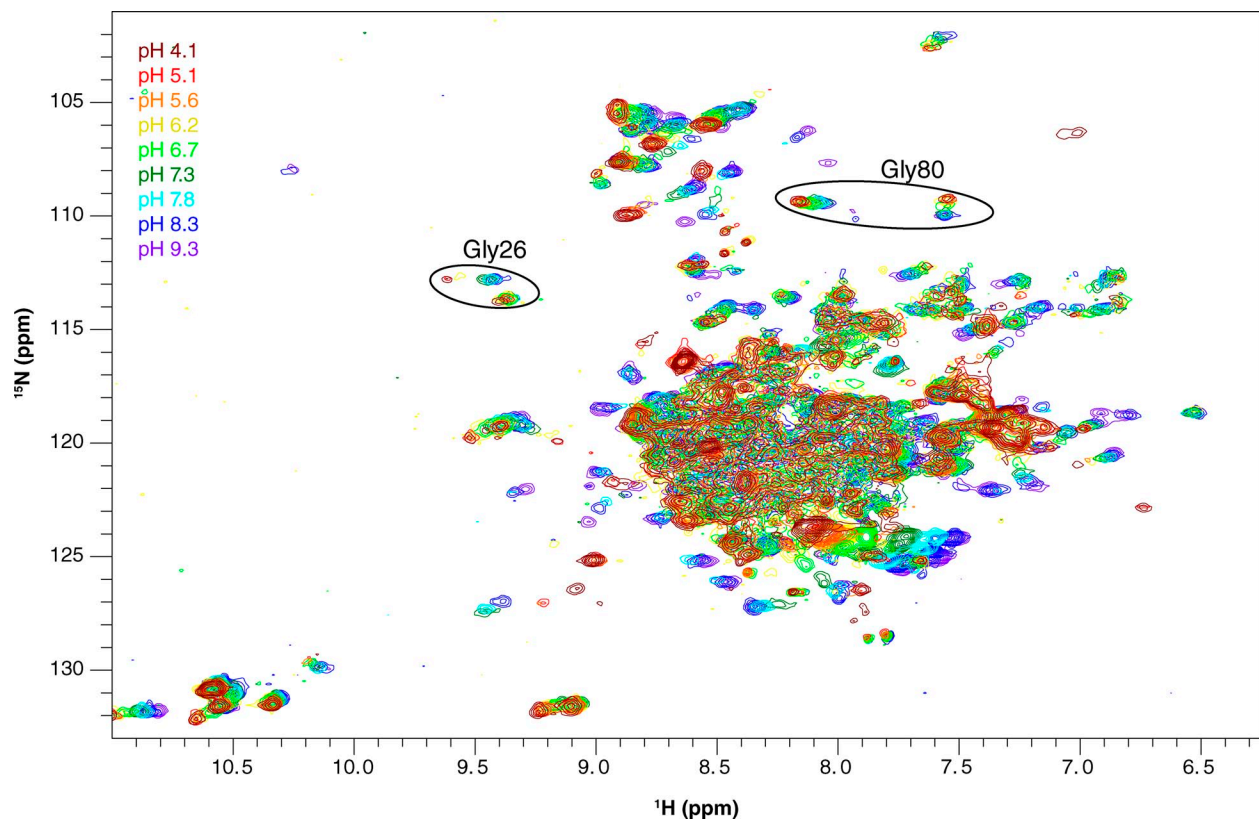

**Figure S3.** Drug-free WT EmrE is sensitive to pH. Full  $^1\text{H}$ - $^{15}\text{N}$  TROSY-HSQC spectra of drug-free EmrE in DLPC/DHPC isotropic bicelles at all pH values collected in the pH titration at 25°C. The pH of each spectrum is indicated by its color as designated in the figure. Circles highlight residues that remain in the slow exchange regime at low pH.
